# Supplementary material for: Arboreal crops on the medieval Silk Road: Archaeobotanical studies at Tashbulak
Source: PLoS One. 2018 Aug 14;13(8):e0201409. doi: 10.1371/journal.pone.0201409 (PMC6091944; doi:10.1371/journal.pone.0201409)
Supplement: S1 Table — (PDF) [file pone.0201409.s001.pdf]

S1 Table

[illegible]
